# Supplementary material
Source: publisher site journal article supplement (https://www.dovepress.com/article/495227)

## Supplementary Figure S1

### The flow chart of animal research

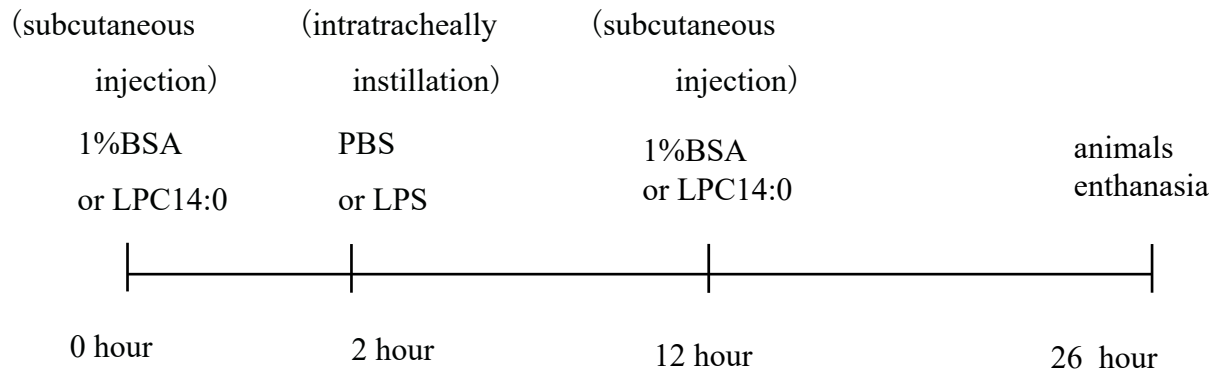

Supplement: Supplementary file 1 [file get_supplementary_file.php]
